# **Habituation and individual variation in the endocrine stress response in the Trinidadian guppy (*Poecilia reticulata*)**

**Running title:** Stress habituation and individual variation

**Keywords:** stress, glucocorticoid, cortisol, individual variation, habituation, phenotypic plasticity

**Authors:** T.M. Houslay<sup>\*a</sup>, R.L. Earley<sup>b</sup>, A.J. Young<sup>a</sup> and A.J. Wilson<sup>a</sup>

<sup>\*</sup>Corresponding author

<sup>a</sup>Centre for Ecology and Conservation, University of Exeter (Penryn Campus), Cornwall, TR10 9FE, UK.

<sup>b</sup>Department of Biological Sciences, University of Alabama, Biology Building 211-213, Box 870344, Tuscaloosa, AL 35487, USA.

## **Email addresses:**

TMH: houslay@gmail.com

RLE: rlearley@ua.edu

AJY: a.j.young@exeter.ac.uk

AJW: a.wilson@exeter.ac.uk

# 1    **Summary statement**

2

3    Trinidadian guppies habituate quickly to repeated stress exposure, and exhibit  
4    consistent differences in their endocrine stress response. We provide a  
5    framework for analysing individual variation in habituation rate.

6

# 7    **Abstract**

8

9    The vertebrate stress response enables individuals to react to and cope with  
10    environmental challenges. A crucial aspect of the stress response is the elevation of  
11    circulating glucocorticoids. However, continued activation of the stress response under  
12    repeated (or chronic) stress can be damaging to fitness. Under certain circumstances it  
13    may therefore be adaptive to habituate to repeated exposures to a particular stressor by  
14    reducing the magnitude of any associated release of glucocorticoids. Here, we  
15    investigate whether Trinidadian guppies (*Poecilia reticulata*) habituate to repeated  
16    exposure to a mild stressor, using a waterborne hormone sampling approach that has  
17    previously been shown to elicit a stress response in small fish. We also test for  
18    individual variation in the extent of habituation to this stressor. Concentrating on freely  
19    circulating cortisol, we found that the first exposure to the assay induced high cortisol  
20    release rates but that guppies tended to habituate quickly to subsequent exposures.  
21    There were consistent differences among individuals in their average cortisol release  
22    rate (after accounting for effects of variables such as body size) over repeated  
23    exposures. Our analyses did not find evidence of individual differences in habituation  
24    rate, although limitations in statistical power could account for this finding. We also  
25    present data on free 11-ketotestosterone, in addition to conjugated forms of both  
26    hormones. We discuss consistent individual differences around the general pattern of  
27    habituation in the flexible stress response, and highlight the potential for individual  
28    variation in habituation to facilitate selection against the deleterious effects of chronic  
29    stress.

30

## 31 Introduction

32 Stress responses involve a complex suite of behavioural, neuroendocrine, and  
 33 physiological processes that act to maintain organismal health and homeostasis in the  
 34 face of unpredictable environmental challenges (Selye 1973; Korte *et al.* 2005; Romero,  
 35 Dickens & Cyr 2009). While disagreements over terminology persist (McEwen and  
 36 Wingfield, 2010; Romero *et al.*, 2009), stress response mechanisms are broadly seen as  
 37 underlying a process of “achieving stability through change” (McEwen and Wingfield,  
 38 2003) and are vital for dealing with acute environmental challenges. However, these  
 39 same mechanisms can actually be damaging to fitness when organisms are exposed to  
 40 chronic stressors (Boonstra, 2013; Dallman *et al.*, 1992; Huether, 1996). Given the  
 41 expectation of such causal links between stress response and fitness, there has been  
 42 increasing interest in characterising variation among individuals for both behavioural  
 43 and neuroendocrine stress response phenotypes (e.g. Cockrem 2013; Houslay *et al.*  
 44 2017). Variation among individuals is a prerequisite for selection to occur, and, if such  
 45 variation also includes a genetic component, then stress response traits have the  
 46 potential to evolve under natural selection in wild populations (Atwell *et al.* 2012;  
 47 Jenkins *et al.* 2014) or be targeted by artificial selection strategies in captive ones  
 48 (Pottinger & Carrick 1999; Louison *et al.* 2017).

49 Among-individual variation has now been documented in behavioural (Bell *et*  
 50 *al.*, 2009) and neuroendocrine (Hau *et al.*, 2016) traits across many taxa. For  
 51 neuroendocrine traits in particular, a distinction is commonly made between ‘baseline’  
 52 and ‘reactivity’ phenotypes. The former represents the phenotypic state (e.g. circulating  
 53 glucocorticoid (GC) level) of an ‘unstressed’ individual, while the latter is the plastic  
 54 change in expression (e.g. increase in GC level) when challenged by an acute stressor.  
 55 Both aspects are likely to vary among individuals within a population (Williams, 2008),  
 56 and their recognition as distinct – but potentially correlated – traits allows a more  
 57 nuanced view of how selection might shape the stress response (Bonier and Martin,  
 58 2016; Cox *et al.*, 2016; Hau and Goymann, 2015; Romero, 2004; Taff and Vitousek,  
 59 2016). Nonetheless, we suggest this framework will not be sufficient to understand the  
 60 fitness consequences of chronic stress exposure. This is because plasticity is relevant not  
 61 just to ‘reactivity’ when challenged by an acute stressor, but also to longer-term changes  
 62 in phenotypic state when faced by chronic repeated exposures to stressors. For instance,  
 63 stress-induced GC release can result in the phenomenon of sensitisation, where the  
 64 individual enters a state of hyper-responsiveness to the same or novel stimuli (Belda *et*  
 65 *al.*, 2015). A more common response to repeated exposure to the same acute stressor,  
 66 however, is habituation (Martí and Armario, 1998).

Habituation can be defined as occurring where repeated, or chronic, application of a stimulus results in a progressively weaker stress response (Thompson and Spencer, 1966). Intuitively, habituation to chronic stressors may offer a route to improved health, particularly if simple behavioural responses (e.g. avoidance of the stressor) are curtailed, which will commonly be the case in captive populations. For example, under chronic stress exposure, continued activation of the hypothalamic-pituitary-adrenal/interrenal (HPA/I) axis can occur. This is a metabolically costly response system (Korte et al., 2005) and sustained elevation of circulating glucocorticoids (GCs) is known to reduce growth, suppress immune function and reproduction, and increase mortality (Berga, 2008; Hodgson et al., 2012; Segerstrom and Miller, 2004; Young et al., 2006). As such it should be adaptive for an organism to habituate (via reductions in the magnitude of the HPA/I response) to stressors that are not inherently harmful (Grissom and Bhatnagar, 2009; McEwen, 2001). If present, variation among individuals in their ability to habituate to a repeated stressor thus represents another form of variable plasticity that could facilitate selection to reduce the deleterious effects of chronic stress in natural and captive populations.

In this study we seek to characterise among-individual variation in stress-related endocrine state and habituation in the Trinidadian guppy, *Poecilia reticulata*. We focus principally on HPI activity and thus cortisol, the major GC in teleost fish (Mommsen et al., 1999). We also conduct a parallel analysis of 11-ketotestosterone (subsequently 11KT) from the samples collected. Links between 11KT and stress response have previously been reported in fishes; chronically elevated cortisol can inhibit 11KT synthesis (Consten et al., 2001; Consten et al., 2002), and social/isolation stressors have been shown to reduce 11KT while elevating cortisol (Galhardo and Oliveira, 2014; Haddy and Pankhurst, 1999; Kubokawa et al., 1999). Here we separate both of these target hormones into their ‘free’ and ‘conjugated’ fractions for analysis. In the main text we present only results from free hormones, the concentration of which in the water is taken to scale with the ‘physiologically active’ concentration of hormones in the fish’s circulation across the duration of the sampling period (Scott and Ellis, 2007). We refer interested readers to Appendix A for information on the conjugated fractions.

Our objectives are not only to determine whether individual fish differ consistently in stress-related endocrine state, but also to determine whether habituation occurs and, if so, whether rates vary among individuals. Our focus on among-individual differences requires repeated sampling of individuals; since this is not feasible using blood sampling in guppies, we adopt a less invasive, waterborne approach to characterising endocrine state. While this method has been widely validated and used

for studies of small fishes (reviewed in Scott & Ellis 2007; Scott *et al.* 2008), including guppies (Fischer *et al.*, 2014), the handling required to transfer the fish into the confined space in which waterborne sampling will be conducted causes cortisol release, complicating attempts to measure baseline GC (e.g., Wong *et al.*, 2008). However, in the current context, this is actually advantageous as we use this initial handling and confinement itself as the stressor to which habituation is predicted to occur. For free cortisol we predict that: (i) average levels will decline over repeated handling and sampling events (1 every 48 hours, for a total of 4 repeats), consistent with habituation; (ii) there will be variation among individuals around the average response, with individuals differing in both average 'reactive' endocrine state and their rate of habituation with repeated subsequent exposures; and (iii) that individuals with higher average circulating cortisol levels also habituate at a slower rate. We make no specific predictions about free 11KT levels beyond a general expectation that they will be negatively correlated with free cortisol.

## 117 **Methods**

### 118 **Animal husbandry and welfare**

The guppies used in this study were taken from our captive population, descended from wild fish collected in 2008 from the lower Aripo River, Trinidad, and housed at the University of Exeter's Penryn campus. We sampled 32 adult fish (17 females, 15 males) from a stock tank haphazardly, and tagged each for identification purposes with coloured elastomer injection under mild MS222 sedation. We housed fish in 2 mixed-sex groups of equal size, using separate tanks that shared a common recirculating water supply. All fish were fed to satiation twice daily (0800-1000h and again at 1600-1800h) using commercial flake food and live *Artemia nauplii*. The experiment described here was carried out in accordance with the UK Animals (Scientific Procedures) Act 1986 under licence from the Home Office (UK), and with local ethical approval from the University of Exeter.

### 130 **Sampling protocol & hormone assay**

We used a waterborne sampling method (Scott *et al.* 2008) to obtain 4 repeated measures of hormones from individual fish at 48hr intervals. To control for diel fluctuations in cortisol, we collected all samples between 1200-1400h. In all cases, we first netted an entire group from the housing aquarium quickly using a large net and transferred them to 2 holding tanks for moving to an adjacent quiet room (performed

136 within 20 seconds of the net first hitting the water). We then transferred fish to  
 137 individual beakers containing 300ml of clean water taken from the main supply (which  
 138 serves as input to the main housing units) for sample collection, placing beakers within  
 139 cardboard ‘chambers’ to prevent fish from seeing each other or being disturbed. 1 fish  
 140 was transferred every 30 seconds, alternating across holding tanks, such that all fish  
 141 were in their beakers within 10 minutes of the initial netting (with maximum 11 net  
 142 entries into the water). Individual ID was noted during transfer to the beaker, and  
 143 sampling order retained for use in statistical models to control for effects of both the  
 144 time between first net entry and transfer to the beaker and the number of net entries  
 145 into the water. After 60 minutes in the beaker, we removed each individual by pouring  
 146 its sample through a clean net into a second beaker (and returned fish to their home  
 147 tank immediately). At each time point, we also collected 2 ‘blank’ samples from the  
 148 water supply.

149 Immediately after sampling, we filtered the water samples (Grade 1 filter paper,  
 150 Whatman) and then passed them through solid phase C18 extraction columns (Sep-  
 151 Pak C18 3cc, Waters) that had been primed with 2 x 2ml HPLC-grade methanol followed  
 152 by 2 x 2ml distilled water, keeping the column moist prior to sample extraction. We used  
 153 high-purity tubing (Tygon 2475, Saint-Gobain) to pass the water samples to the  
 154 columns, through which they were drawn slowly under vacuum pressure (see Earley et  
 155 al., 2006 for detail). Following extraction, we washed columns with 2 x 2ml distilled  
 156 water to purge salts. We then covered both ends of each column with film (Parafilm M,  
 157 Bemis) and stored them at -20°C for future analysis. We rinsed all beakers, tubes and  
 158 funnels with 99% ethanol and distilled water prior to each sampling procedure.

159 We later shipped the frozen columns on dry ice from the University of Exeter’s  
 160 Penryn campus to the University of Alabama. We thawed each column and purged with  
 161 2 x 2ml distilled water before eluting both free and conjugated (sulphated and  
 162 glucuronidated) hormones. We used 2 x 2ml ethyl acetate and 2 x 2 ml HPLC-grade  
 163 methanol in successive, separate washes to elute free and conjugated hormones  
 164 respectively into separate 13 x 100 mm borosilicate vials. For the free fraction, ethyl  
 165 acetate was evaporated under nitrogen in a water bath at 37°C, leaving a hormone  
 166 residue, which was resuspended in 600 µl of 5% EtOH: 95% EIA kit buffer (the latter  
 167 supplied with Cayman Chemicals, Inc. EIA kits) and vortexed for 20 minutes. For the  
 168 conjugated hormones, methanol was evaporated under nitrogen and the hormone  
 169 residue was resuspended in 600 µl of 5% EtOH: 95% EIA kit buffer. The resuspended  
 170 conjugates were then diluted with 8 ml distilled water, re-extracted over primed solid  
 171 phase C18 extraction columns (Sep-Pak C18 3cc, Waters) and eluted into 13 x 100 mm

borosilicate vials with 2 x 2 ml successive washes of methanol, which was evaporated under nitrogen. We processed these samples further according to previously published protocols with some modification (Canario and Scott, 1989; Scott and Canario, 1992; Scott and Vermeirssen, 1994).

Briefly, 1 ml trifluoroacetic acid [TFA]:ethyl acetate (1:100) was added to the hormone residue and incubated overnight in a water bath at 37°C. The TFA:ethyl acetate was evaporated under nitrogen at 37°C followed by addition of 0.5 ml 0.1M sodium acetate buffer (pH 4.5). We vortexed the sample for 5 minutes, followed by addition of 4 ml diethyl ether and a further 5 minutes of vortexing. We then allowed samples to sit for approximately 30 minutes to enable separation of the organic and aqueous phases, and then immersed the samples in a methanol-dry ice bath to freeze the aqueous phase. The organic phase containing the sulphated fraction was poured off into a new 13 x 100 mm borosilicate vial. 10µl of β-glucuronidase (Sigma Aldrich, Cat No. G-7017) was added to the remaining aqueous phase and incubated overnight in a water bath at 37°C, followed by the diethyl ether extraction as described above. The organic phase containing the glucuronidated fraction was poured into the same vial as the ether containing the sulphated fraction to produce a sample with total conjugated hormone. Diethyl ether was evaporated under nitrogen in a 37°C water bath and the hormone residue was resuspended in 200µl of 5% EtOH: 95% EIA kit buffer followed by vortexing for 20 min. We ran assays in strict accordance with the manufacturer's instructions, and all samples were run in duplicate.

We generated a pooled waterborne hormone extract for males and females separately by combining 20 µl taken from each of the 128 samples. These pools were serially diluted to assess parallelism with the standard curves from the Cayman Chemicals, Inc cortisol and 11KT kits. Two serial dilution curves were run in duplicate for each hormone, and each was parallel to the standard curve (slope comparison test, Zar, 1996, p. 355; Cortisol-1:  $t_{12} = 0.204$ ,  $P = 0.84$ ; Cortisol-2:  $t_{12} = 0.013$ ,  $P = 0.99$ ; 11KT-1:  $t_{12} = 0.02$ ,  $P = 0.98$ ; 11KT-2:  $t_{12} = 0.005$ ,  $P = 0.99$ ). We also ran the pooled samples in duplicate at both the beginning and end of each of the four 96-well plates for each hormone (free fraction) to assess intra- and inter-assay coefficients of variation. Intra-assay coefficients of variation were 6.9%, 11.5%, 4.9%, and 9.5% for each of the cortisol plates and 7.8%, 3.4%, 2.9%, and 1.6% for each of the 11KT plates; the inter-assay coefficients for cortisol and 11KT were 10.7% and 7.3%, respectively. We generated a separate pool for the conjugated hormone, which was run in duplicate at the beginning and end of an additional four 96-well plates for each hormone (conjugated fraction). Intra-assay coefficients of variation were 4.9%, 7.7%, 6.6% and 5.6% for cortisol and

208 5.6%, 15.2%, 7.6% and 10.1% for 11KT; the inter-assay coefficients for cortisol and  
209 11KT were 6.5% and 11.3%, respectively.

## 210 **Modelling approach and statistical analysis**

211 In what follows we conceptualise habituation as plasticity in endocrine state with  
212 respect to repeated stressor exposure. This allows us to test for and characterise among-  
213 individual variation in habituation using the well-known ‘character state’ and ‘reaction  
214 norm’ frameworks for analysing plasticity (Henderson, 1982; Nussey et al., 2007; Van  
215 Noordwijk, 1989; Via et al., 1995). In the reaction norm framework, which we illustrate  
216 graphically in Fig. 1, each individual’s endocrine state is modelled as a linear function of  
217 sampling repeat number. This allows us to characterise among-individual variation in  
218 habituation (i.e. plasticity in endocrine state) using random regression (i.e. random  
219 slope) linear mixed effect models. Under the alternative character state approach,  
220 endocrine state at each sampling repeat is treated as a distinct (but potentially  
221 correlated) sub-trait. When more than 2 such sub-traits exist, the character state  
222 approach provides more information than the simple linear formulation of random  
223 regression, although this additional flexibility does require the estimation of additional  
224 parameters (Roff and Wilson, 2014). Using this approach, positive (within-individual)  
225 correlation across observations provides evidence of repeatable variation in endocrine  
226 state. If variation in habituation also occurs then this will lead to changes in observed  
227 endocrine state variance over sampling repeats, and/or declining (within-individual)  
228 correlation with increasing time between observations (such that  $r_{1,2} > r_{1,3} > r_{1,4}$ ).

229 The analysis procedure described below was performed separately for both free  
230 and conjugated forms of cortisol (log nanograms) and 11-ketotestosterone (log  
231 picograms). We present only the results for free hormones below, with results and  
232 discussion of conjugated forms available in Appendix A. All analyses were performed in  
233 R version 3.4.1 (R Core Team, 2017), using the package ASreml-R 3.0 (Butler, 2009) to  
234 test for hypothesised changes in mean endocrine state with repeated samplings, and to  
235 characterise variation among-individuals around this mean state. We used visual  
236 representations of model residuals to check that the assumptions of regression  
237 modelling were met in all cases. A single measurement of conjugated 11KT was  
238 excluded from all relevant analyses as it was far outside the range of all other values,  
239 and exerted large influence on the fitted model when included. Note that we control for  
240 any effects of sex in the statistical models and also include body mass as a covariate to  
241 account for the expected relationship between size and hormone release rates. We do  
242 not adjust observed endocrine state for size prior to modelling since this causes



243 problems of interpretation for repeatability estimates (Wilson, 2018). Data handling and  
244 visualisation in R was carried out using the ‘tidyverse’ packages (Wickham, 2017). R  
245 code for performing the analyses is provided in the supplementary materials.

#### 246 *Habituation effects on mean hormone levels*

247 For each of the endocrine response traits ( $\text{Cort}_{\text{free}}$ ,  $11\text{KT}_{\text{free}}$ ,  $\text{Cort}_{\text{conjugate}}$ ,  $11\text{KT}_{\text{conjugate}}$ ) in  
248 turn, we tested for the hypothesised effects of habituation on hormone levels across  
249 repeated assays by fitting assay repeat (as a categorical variable with levels 1 to 4). We  
250 also included sex, and the interaction of sex and assay repeat to account for any sex  
251 difference in mean endocrine state or in average habituation. We specified assay repeat  
252 as a factor rather than as a continuous predictor to allow maximum flexibility (i.e., to  
253 avoid imposing a linear response in the mean). Tank (2-level categorical variable),  
254 sampling order (the order transferred from the holding tank to the individual beakers,  
255 fitted as a mean-centred linear effect), and body mass were included as further  
256 covariates to control for potential sources of variance not relevant to our present  
257 hypotheses. We standardised body mass measurements by centring and scaling  
258 (subtracting the population mean and dividing by the standard deviation) to improve  
259 their interpretability (Gelman and Hill, 2007; Schielzeth, 2010). We used conditional  
260 Wald F-tests to test all fixed effects, and reduced the model by dropping the sex  $\times$  assay  
261 repeat interaction if not significant. For fixed effects inference we use a ‘random slopes’  
262 model (described below) where possible, which groups repeated measures to avoid  
263 pseudoreplication and also allows individuals to vary as a continuous function of  
264 stressor exposure, preventing inflation of Type I and Type II errors when estimating  
265 population-level effects (Schielzeth and Forstmeier, 2009). In cases where the random  
266 slopes model did not converge, we used a random intercepts model instead.

#### 267 *Among-individual variation*

268 First, for each response trait in turn we tested for among-individual variance within the  
269 reaction norm framework. For each response trait we use the simplified fixed effects  
270 structure as determined by the model used to test for habituation described above. To  
271 test for repeatable differences in average hormone levels (i.e., among-individual  
272 variance in reaction norm intercept) across all four repeats, we compared a ‘null’ model  
273 (with no random effects) to one in which we fit a random effect of individual ID. We then  
274 extended the random intercepts model to include among-individual differences in  
275 habituation rate (i.e., reaction norm slopes), by fitting both a random ID effect and a  
276 random interaction of ID with assay repeat number (this time as a continuous  
277 covariate), as well as the intercept-slope covariance. We compared nested models using

likelihood ratio tests (LRTs), in which we assume that twice the difference in model log-likelihoods conforms to a chi-square distribution where the degrees of freedom are set by the number of additional parameters in the more complex model. When testing the effect of a single variance term, the test statistic distribution is assumed to correspond to a 50:50 mix of chi-squared distributions having 0 and 1 degrees of freedom respectively (Self and Liang, 1987; Visscher, 2006).

Second, for each response variable we formulated a multivariate (4-‘trait’) model to test hypotheses about variance in – and covariance among – the four repeat-specific observations. Rather than using the raw data, we estimated (co)variances conditional on the repeat-specific means as well as fixed effects as described above. We fitted a series of nested models to test hypotheses about the structure of individual variation. The first model estimated no covariances, and constrained the repeat-specific variances to be equal. Model 2 allowed the repeat-specific variances to differ, and model 3 extended model 2 by also estimating all covariances. We compare nested models using LRTs as detailed above. Model 2 vs model 1 therefore tests whether phenotypic variance (conditional on fixed effects) changes significantly across repeats (i.e., that the amount of variation among individuals in hormone state changes over the repeated exposures, suggesting variation in habituation), and model 3 vs model 2 tests for the existence of significant within-individual covariance structure (i.e., that some degree of repeatability exists). Model 3 estimates the within-individual covariance-correlation matrix (conditional on fixed effects), which we used as the basis for a parametric bootstrap method (described in Boulton *et al.* 2014; Houslay *et al.* 2017) to generate approximate 95% confidence intervals on all parameters. Inspection of these parameters and their associated 95% CIs can also be used to diagnose variation in habituation (again, evidenced by changes in observed endocrine state variance over sampling repeats, and/or declining (within-individual) correlation with increasing time between observations (such that  $r_{1,2} > r_{1,3} > r_{1,4}$ )).

## Results

### Changes in hormone concentrations following repeated stress exposures

Both free cortisol and free 11KT show significant changes in their mean waterborne concentrations (i.e., immediately following transfer-related stress exposure) across the four successive stress exposures. Free cortisol concentration follows a pattern that largely conforms to our expectations of habituation, the mean declining significantly from stress exposures 1 to 2 and remaining stable at 3, although then showing a slight

increase at exposure 4 (Fig. 2A, Table 1A). Females produce higher levels of cortisol than do males across all repeats. We find no sex differences in habituation rate for free cortisol (sex  $\times$  stressor number interaction:  $F_{3, 63.3} = 0.63$ ,  $P = 0.60$ ). In contrast, male and female guppies do differ in how their 11KT levels change across repeated assays (sex  $\times$  stressor number interaction:  $F_{3, 65.9} = 5.11$ ,  $P = 0.003$ ; Fig. 3, Table 1B). Males show fairly stable levels of 11KT across all repeats, while females show increased 11KT after the first assay. Males consistently produce greater levels of 11KT in comparison to females.

### Reaction norm analyses of among-individual variation

LRT comparison of the univariate mixed models with and without a random effect of individual identity) provides statistical support for repeatable differences in average free cortisol concentrations across the repeated stress exposures. That said, the adjusted repeatability (i.e., the ratio of among-individual variation to phenotypic variation conditional on fixed effects) for free cortisol is relatively low ( $R=0.15$  SE 0.10,  $\chi^2_{0.1} = 3.11$ ,  $P = 0.04$ ). Individuals do not show significant differences in their average level of free 11KT ( $R=0.03$  SE 0.08,  $\chi^2_{0.1} = 0.14$ ,  $P = 0.36$ ).

Addition of random reaction norm slope terms to the mixed models does not lead to a significantly better model for either free cortisol or free 11KT. For free cortisol, visual inspection of model predictions is certainly suggestive of an improved fit to the observed data (Figs 2B,C), though the apparent improvement is not significant ( $\chi^2_2 = 4.12$ ,  $P = 0.13$ ). Under this random slope model, the correlation between individual intercepts and slopes is strongly positive (such that individuals with higher average levels of cortisol also had a more positive slope), although the standard errors around the estimate are large ( $r = 0.88$  SE 0.56). For free 11KT we were unable to detect any estimable variance in random slope ( $\chi^2_2 = 0$ ,  $P = 1$ ).

### Character state analyses of among-individual variation

For free cortisol, there is a significant change in repeat-specific variances, such that variance increases over successive repeats (model 2 vs model 1:  $\chi^2_3 = 8.2$ ,  $P = 0.03$ ; Fig. 4). This increase in variance over stress exposures suggests individuals may differ in their patterns of habituation. We also found significant within-individual covariance structure between repeats (model 3 vs model 2:  $\chi^2_6 = 14.0$ ,  $P = 0.03$ ), indicative of some repeatable variation among individuals. However, examination of the covariance-correlation matrix (Table 2A) shows that the correlations, though largely positive (5 out of 6) as predicted, are relatively weak (ranging from -0.239 to 0.345). Furthermore, there is no clear pattern of decline in the strength of the correlations as the interval

346 between pairs of exposures increases. For free 11KT, we found no significant changes in  
347 repeat-specific variances for (model 2 vs model 1:  $\chi^2_3 = 0.6$ ,  $P = 0.89$ ), and no evidence  
348 for significant within-individual covariance structure (model 3 vs model 2:  $\chi^2_6 = 3.1$ ,  $P =$   
349 0.62; correlations ranging from -0.184 to 0.197, Table 2B).

## 350 Discussion

351 Our results show a striking pattern of change in the mean stress-induced free cortisol  
352 concentrations expressed by guppies across repeated stress exposures. This pattern was  
353 consistent with our predictions regarding habituation to the sampling protocol stressor  
354 following repeated exposure to it, with fish showing significantly higher free cortisol  
355 concentrations during the first exposure than during the following three. Free 11KT  
356 concentrations also change on average across the repeated stress exposures, most  
357 clearly in females which produce relatively low 11KT levels on the first (nominally more  
358 stressful) exposure relative to later ones. Our analyses of among-individual variation –  
359 conducted within both random regression and multivariate “character state”  
360 frameworks – also provide clear evidence that individuals differ in their average stress-  
361 induced hormone levels across sampling events. While we find some limited support for  
362 our final prediction that individuals would also differ in their rates of habituation with  
363 regard to stress-induced free cortisol release, statistical evidence is equivocal  
364 (potentially due to limited statistical power).

### 366 *Habituation in stress-induced free hormone concentrations*

367 The high levels of (average) free cortisol during the first stress exposure, coupled with  
368 the decreased levels during subsequent exposures, are consistent with our prediction  
369 that habituation should occur with repeated stressor exposure. The population-level  
370 habituation dynamics seen here echo largely those reported previously in guppies  
371 (Fischer et al., 2014) and other small fish (e.g., Wong et al. 2008; Fürtbauer et al. 2015).  
372 This pattern constitutes a form of plasticity in stress responsiveness that is widely  
373 considered adaptive in the context of ‘coping’ with environmental challenges: while the  
374 stress response enables individuals to react appropriately to acute environmental  
375 change, habituation may be important to protect against the wear and tear that would  
376 arise from continued activation of the HPA/I axis. Less clear, however, is the reason for  
377 the apparent increase in the stress-induced free cortisol concentration levels between  
378 the third and fourth stress exposures (Fig. 2A). While the average level of free cortisol is  
379 still lower during the fourth stress exposure than the first – indicating that individuals

are still habituated to repeated stress exposure – there is a small increase in the final stress exposure compared to the second and third. This pattern is suggestive of a more complex change in HPA/I axis performance in response to repeated stress exposure than initially envisaged, and could conceivably reflect a number of different physiological changes acting in isolation or concert. For example, while this pattern could reflect an increase in the magnitude of stress-induced cortisol release between exposures 3 and 4 (consistent with some form of attenuation of habituation), it could also arise in part from impacts of habituation on baseline cortisol concentrations prior to stress exposure (if baseline cortisol concentrations rose over the course of habituation, this too could contribute to an increase in the stress-induced cortisol concentrations). Teasing apart the relative contributions of these proximate explanations for the observed pattern would be fruitful prior to speculation on ultimate explanations.

We also find evidence of clear sexual dimorphism in levels of stress-induced free cortisol, with females producing more on average across all repeats. This endocrine sex difference cannot be attributed simply to sex differences in body mass (female guppies being much larger on average than males, and also more variable), as a linear effect of body mass was not significant in our model of free cortisol. This sex difference in stress responsive cortisol levels could therefore reflect different selection pressures acting on the male and female stress response, possibly due to sex differences in life histories, rather than simple associations with body size (Ricklefs and Wikelski, 2002). Male guppies have higher free 11KT concentrations than females across all stress exposures, in line with the androgenic role of this hormone. However, while the cortisol habituation dynamics are remarkably similar between males and females, 11KT shows sex-specific trajectories across repeat stress exposures. Male levels remain stable (on average) while females tend to have a depressed initial response before stabilising at a higher level. While increased cortisol concentrations have been shown to depress circulating 11KT concentrations in other (male) teleost fish (e.g. male *Salmo trutta*, Pickering et al., 1987), we see no evidence of a link between the stress-induced concentrations of the two hormones in male guppies. 11KT is important for male mating behaviour in teleosts generally (Borg, 1994); given the well-characterised sexual selection through female choice on male guppies (Brooks and Endler, 2001; Head and Brooks, 2006; Luyten and Liley, 1991), it seems plausible that a lack of stress-sensitivity reflects strong selection on males to maintain mating behaviours even in the face of high environmental stress. In females, by contrast, the low 11KT concentrations during the first stress exposure relative to the following exposures could indeed be consistent with GC-related inhibition

of circulating 11KT concentrations: the strongest cortisol response in the first stress exposure could be depressing 11KT levels to a greater extent than the weaker cortisol responses to the subsequent exposures.

*Individual variation in stress-induced hormone levels and habituation*

In addition to the population-level evidence of habituation reported above, we also find evidence of consistent differences among individuals in their average stress-induced free cortisol concentrations (after controlling statistically for variation in body size). Whether there are differences among individuals in their rate of habituation to the stressor is less clear. Plotting fitted reaction norms shows that individuals seem to diverge over repeated stress exposures, yet allowing for the existence of individual differences in these habituation gradients did not yield a model of significantly better fit to the data than assuming that all individuals shared the same habituation gradient. Similarly, the character state approach shows that individual variance increases over successive repeats; however, the covariance structure is not consistently positive, suggesting that this is not a simple case of individuals habituating at different rates. That these patterns are suggestive of individual variation in habituation, but without yielding conclusive evidence for it, points to a lack of sufficient power in our study. Mixed effects models – particularly those with complex random effects structures – can be data hungry, and it appears likely that a greater number of individuals would need to be assayed in order to demonstrate that there are significant differences among individuals in their rate of to habituation to a repeated stressor (Martin et al., 2011). Similar (but higher-powered) studies are required to shed light upon the causes and consequences of individual variation in endocrine traits.

One of the main drivers behind the interest in among-individual variation in labile traits is that its presence means there is an opportunity for selection to act on them. Such variation can stem from a variety of different sources, which have been discussed widely in the behavioural literature (e.g., Bierbach et al., 2017; Fisher et al., 2018; Reale et al., 2010) and are liable to apply to the endocrine stress response as well. For example, previous studies in guppies alone have shown effects on the GC response due to developmental plasticity (Chouinard-Thuly et al., 2018) and environmental stressors (Fischer et al., 2014). Recent studies of the population used here have shown that stress-related behaviours also respond plastically to environmental change (perceived level of predation risk) but show limited among-individual variation in this plasticity (Houslay et al., 2018). We also know that that these behaviours are under some degree of genetic control (White and Wilson, 2018; White et al., 2018), which may

or may not be the case for cortisol expression. In fact, some debate exists as to whether hormone levels themselves can be viewed as heritable ‘traits’ under selection (Hau and Goymann, 2015; Zera et al., 2007), but there is certainly increasing evidence of a genetic basis to GC variation (Jenkins et al., 2014; Stedman et al., 2017). Links between GC baseline and/or reactivity and individual fitness have also been documented in a number of species (Blas et al., 2007; Cabezas et al., 2007; Patterson et al., 2014; Vitousek et al., 2014; Vitousek et al., 2018). Williams (2008) advocated looking beyond the ‘tyranny of the Golden Mean’ to embrace individual variation in endocrine systems; this challenge is starting to be taken up, with exciting possibilities for our understanding of the evolution of flexible phenotypes and hormonally mediated suites of traits (discussed further in Cockrem, 2013; Hau et al., 2016; Hau and Goymann, 2015; Taff and Vitousek, 2016).

464

#### 465 *Conclusions*

As predicted, we find that guppies habituate quickly to repeated exposure to a stressor. We also provide examples of a framework for characterising GC variability and flexibility within and among individuals using both reaction norm and character state approaches. Our results show individual variation in stress-induced cortisol levels, in addition to some limited evidence of individual variation in habituation to the stressor. Such variation provides material for selection to act upon, and could (given underlying genetic variation in habituation rate) enable a population to mount an evolutionary response – for example, to the deleterious effects of a failure to habituate to chronic stress. Given the current lack of consensus around how to diagnose chronic stress in populations (Dickens and Romero, 2013), one fruitful line of future research could be to estimate covariance at the among-individual or genetic level between failure to habituate to repeated exposure to a predictable, homotypic stressor (such as the sampling process itself) and a loss of body mass, changes in behaviour, or even survival. More broadly, our study adds to the burgeoning body of research showing that individuals differ in flexible endocrine traits that are likely to influence fitness. Future challenges include the investigation of whether individual habituation rates are themselves repeatable, and whether genetic links exist between GC variation and other aspects of the phenotype on which selection acts.

484

## 485 **Acknowledgements**

486 We are grateful to A.J. Grimmer for assistance with animal husbandry, and to P. Sharman  
487 for help in the lab.

## 488 **Funding**

489 This work was supported by the Biotechnology and Biological Sciences Research Council  
490 (BBSRC; grant numbers BB/L022656/1, BB/M025799/1).

## 491 **Competing interests**

492 No competing interests declared.

## 493 **Data statement**

494 The data used in this study will be uploaded to Dryad upon completion. R code for  
495 analyses is provided in the supplementary materials.

496

## 497 **References**

498

499 **Atwell, J. W., Cardoso, G. C., Whittaker, D. J., Campbell-Nelson, S., Robertson, K. W.**

500 **and Ketterson, E. D.** (2012). Boldness behavior and stress physiology in a novel  
501 urban environment suggest rapid correlated evolutionary adaptation. *Behav. Ecol.*  
502 **23**, 960–969.

503 **Belda, X., Fuentes, S., Daviu, N., Nadal, R. and Armario, A.** (2015). Stress-induced  
504 sensitization: The hypothalamic-pituitary-adrenal axis and beyond. *Stress* **18**, 269–  
505 279.

506 **Bell, A. M., Hankison, S. J. and Laskowski, K. L.** (2009). The repeatability of behaviour:  
507 a meta-analysis. *Anim. Behav.* **77**, 771–783.

508 **Berga, S. L.** (2008). Stress and reproduction: A tale of false dichotomy? *Endocrinology*  
509 **149**, 867–868.

510 **Bierbach, D., Laskowski, K. L. and Wolf, M.** (2017). Behavioural individuality in clonal  
511 fish arises despite near-identical rearing conditions. *Nat. Commun.* **8**, 15361.

512 **Blas, J., Bortolotti, G. R., Tella, J. L., Baos, R. and Marchant, T. A.** (2007). Stress  
513 response during development predicts fitness in a wild, long lived vertebrate. *Proc.*  
514 *Natl. Acad. Sci.* **104**, 8880–8884.

515 **Bonier, F. and Martin, P. R.** (2016). How can we estimate natural selection on  
516 endocrine traits? Lessons from evolutionary biology. *Proc. R. Soc. B Biol. Sci.* **283**,  
517 20161887.

518 **Boonstra, R.** (2013). Reality as the leading cause of stress: Rethinking the impact of



519 chronic stress in nature. *Funct. Ecol.* **27**, 11–23.

520 **Borg, B.** (1994). Androgens in teleost fishes. *Comp. Biochem. Physiol. Part C Comp.* **109**,  
521 219–245.

522 **Boulton, K., Grimmer, A. J., Rosenthal, G. G., Walling, C. A. and Wilson, A. J.** (2014).  
523 How stable are personalities? A multivariate view of behavioural variation over  
524 long and short timescales in the sheephead swordtail, *Xiphophorus birchmanni*.  
525 *Behav. Ecol. Sociobiol.* **68**, 791–803.

526 **Brooks, R. C. and Endler, J. A.** (2001). Female guppies agree to differ: phenotypic and  
527 genetic variation in mate-choice behavior and the consequences for sexual  
528 selection. *Evolution (N. Y.)* **55**, 1644–55.

529 **Butler, D.** (2009). asreml: asreml() fits the linear mixed model.

530 **Cabezas, S., Blas, J., Marchant, T. A. and Moreno, S.** (2007). Physiological stress levels  
531 predict survival probabilities in wild rabbits. *Horm. Behav.* **51**, 313–320.

532 **Canario, A. V. M. and Scott, A. P.** (1989). Synthesis of 20 $\alpha$ -hydroxylated steroids by  
533 ovaries of the dab (*Limanda limanda*). *Gen. Comp. Endocrinol.* **76**, 147–158.

534 **Chouinard-Thuly, L., Reddon, A. R., Leris, I., Earley, R. L. and Reader, S. M.** (2018).  
535 Developmental plasticity of the stress response in female but not in male guppies.  
536 *R. Soc. Open Sci.* **5**, 172268.

537 **Chrousos, G. P.** (1997). Stressors, Stress, and Neuroendocrine Integration of the  
538 Adaptive Response. *Ann. N. Y. Acad. Sci.* 311–335.

539 **Cockrem, J. F.** (2013). Individual variation in glucocorticoid stress responses in animals.  
540 *Gen. Comp. Endocrinol.* **181**, 45–58.

541 **Consten, D., Keuning, E. D., Terlouw, M., Lambert, J. G. D. and Goos, H. J. T.** (2001).  
542 Cortisol effects on the testicular androgen synthesizing capacity in common carp,  
543 *Cyprinus carpio* L. *Fish Physiol. Biochem.* **25**, 91–98.

544 **Consten, D., Lambert, J. G. D., Komen, H. and Goos, H. J. T.** (2002). Corticosteroids  
545 affect the testicular androgen production in male common carp (*Cyprinus carpio*  
546 L.). *Biol. Reprod.* **66**, 106–111.

547 **Cox, R. M., McGlothlin, J. W. and Bonier, F.** (2016). Hormones as Mediators of  
548 Phenotypic and Genetic Integration: An Evolutionary Genetics Approach. *Integr.*  
549 *Comp. Biol.* **56**, 126–137.

550 **Dallman, M. F., Akana, S. F., Scribner, K. A., Bradbury, M. J., Walker, C. and Strack, A.**  
551 **M.** (1992). Stress, Feedback and Facilitation in the Hypothalamo-Pituitary- Adrenal  
552 Axis. *J. Neuroendocrinol.* **4**,.

553 **Dickens, M. J. and Romero, L. M.** (2013). A consensus endocrine profile for chronically  
554 stressed wild animals does not exist. *Gen. Comp. Endocrinol.* **191**, 177–189.

555 **Earley, R. L., Edwards, J. T., Aseem, O., Felton, K., Blumer, L. S., Karom, M. and**  
556 **Grober, M. S.** (2006). Social interactions tune aggression and stress  
557 responsiveness in a territorial cichlid fish (*Archocentrus nigrofasciatus*). *Physiol.*  
558 *Behav.* **88**, 353–363.

559 **Fischer, E. K., Harris, R. M., Hofmann, H. a. and Hoke, K. L.** (2014). Predator exposure  
560 alters stress physiology in guppies across timescales. *Horm. Behav.* **65**, 165–72.

561 **Fisher, D. N., Brachmann, M. and Burant, J. B.** (2018). Complex dynamics and the  
562 development of behavioural individuality. *Anim. Behav.* 6–11.

563 **Fürtbauer, I., Pond, A., Heistermann, M. and King, A. J.** (2015). Personality, plasticity  
564 and predation: linking endocrine and behavioural reaction norms in stickleback  
565 fish. *Funct. Ecol.* n/a-n/a.

566 **Galhardo, L. and Oliveira, R. F.** (2014). The effects of social isolation on steroid  
567 hormone levels are modulated by previous social status and context in a cichlid  
568 fish. *Horm. Behav.* **65**, 1–5.

569 **Gelman, A. and Hill, J.** (2007). *Data analysis using regression and multilevel/hierarchical*  
570 *models*. New York: Cambridge University Press.

571 **Grissom, N. and Bhatnagar, S.** (2009). Habituation to repeated stress: Get used to it.  
572 *Neurobiol. Learn. Mem.* **92**, 215–224.

573 **Haddy, J. A. and Pankhurst, N. W.** (1999). Stress-induced changes in concentrations of  
574 plasma sex steroids in black bream. *J. Fish Biol.* **55**, 1304–1316.

575 **Hau, M. and Goymann, W.** (2015). Endocrine mechanisms, behavioral phenotypes and  
576 plasticity: known relationships and open questions. *Front. Zool.* **12**, S7.

577 **Hau, M., Casagrande, S., Ouyang, J. Q. and Baugh, A. T.** (2016). Glucocorticoid-  
578 Mediated Phenotypes in Vertebrates. In *Advances in the Study of Behavior*, pp. 41–  
579 115. Elsevier Ltd.

580 **Head, M. L. and Brooks, R.** (2006). Sexual coercion and the opportunity for sexual  
581 selection in guppies. *Anim. Behav.* **71**, 515–522.

582 **Henderson, C. J.** (1982). Analysis of Covariance in the Mixed Model: Higher-Level,  
583 Nonhomogeneous, and Random Regressions. *Biometrics* **38**, 623–640.

584 **Hodgson, P. D., Aich, P., Stookey, J., Popowych, Y., Potter, A., Babiuk, L. and Griebel,**  
585 **P. J.** (2012). Stress significantly increases mortality following a secondary bacterial  
586 respiratory infection. *Vet. Res.* **43**, 21.

587 **Houslay, T. M., Vierbuchen, M., Grimmer, A. J., Young, A. J. and Wilson, A. J.** (2018).  
588 Testing the stability of behavioural coping style across stress contexts in the  
589 Trinidadian guppy. *Funct. Ecol.* **32**, 424–438.

590 **Huether, G.** (1996). The central adaptation syndrome: Psychosocial stress as a trigger

591 for adaptive modification of brain structure and brain function. *Prog. Neurobiol.* **48**,  
592 569–612.

593 **Jenkins, B. R., Vitousek, M. N., Hubbard, J. K. and Safran, R. J.** (2014). An  
594 experimental analysis of the heritability of variation in glucocorticoid  
595 concentrations in a wild avian population. *Proc. R. Soc. B Biol. Sci.* **281**, 20141302–  
596 20141302.

597 **Johnson, E. O., Kamilaris, T. C., Chrousos, G. P. and Gold, P. W.** (1992). Mechanisms of  
598 stress: A dynamic overview of hormonal and behavioral homeostasis. *Neurosci.*  
599 *Biobehav. Rev.* **16**, 115–130.

600 **Kidd, C. E., Kidd, M. R. and Hofmann, H. A.** (2010). Measuring multiple hormones from  
601 a single water sample using enzyme immunoassays. *Gen. Comp. Endocrinol.* **165**,  
602 277–285.

603 **Korte, S. M., Koolhaas, J. M., Wingfield, J. C. and McEwen, B. S.** (2005). The Darwinian  
604 concept of stress: Benefits of allostasis and costs of allostatic load and the trade-  
605 offs in health and disease. *Neurosci. Biobehav. Rev.* **29**, 3–38.

606 **Kubokawa, K., Watanabe, T., Yoshioka, M. and Iwata, M.** (1999). Effects of acute  
607 stress on plasma cortisol, sex steroid hormone and glucose levels in male and  
608 female sockeye salmon during the breeding season. *Aquaculture* **172**, 335–349.

609 **Louison, M. J., Adhikari, S., Stein, J. A. and Suski, C. D.** (2017). Hormonal  
610 responsiveness to stress is negatively associated with vulnerability to angling  
611 capture in fish. *J. Exp. Biol.* **220**, 2529–2535.

612 **Luyten, P. H. and Liley, N. R.** (1991). Sexual selection and competitive mating success  
613 of male guppies (*Poecilia reticulata*) from four Trinidad populations. *Behav. Ecol.*  
614 *Sociobiol.* **28**, 329–336.

615 **Martí, O. and Armario, A.** (1998). Anterior pituitary response to stress: Time-related  
616 changes and adaptation. *Int. J. Dev. Neurosci.* **16**, 241–260.

617 **Martin, J. G. A., Nussey, D. H., Wilson, A. J. and Réale, D.** (2011). Measuring individual  
618 differences in reaction norms in field and experimental studies: a power analysis of  
619 random regression models. *Methods Ecol. Evol.* **2**, 362–374.

620 **McEwen, B. S.** (2001). Plasticity of the hippocampus: adaptation to chronic stress and  
621 allostatic load. *Ann. N. Y. Acad. Sci.* **933**, 265–277.

622 **McEwen, B. S. and Wingfield, J. C.** (2003). The concept of allostasis in biology and  
623 biomedicine. *Horm. Behav.* **43**, 2–15.

624 **McEwen, B. S. and Wingfield, J. C.** (2010). What is in a name? Integrating homeostasis,  
625 allostasis and stress. *Horm. Behav.* **57**, 105–111.

626 **Mommsen, T. P., Vijayan, M. M. and Moon, T. W.** (1999). Cortisol in teleosts:

627 Dynamics, mechanisms of action, and metabolic regulation. *Rev. Fish Biol. Fish.* **9**,  
628 211–268.

629 **Nussey, D. H., Wilson, A. J. and Brommer, J. E.** (2007). The evolutionary ecology of  
630 individual phenotypic plasticity in wild populations. *J. Evol. Biol.* **20**, 831–44.

631 **Patterson, S. H., Hahn, T. P., Cornelius, J. M. and Breuner, C. W.** (2014). Natural  
632 selection and glucocorticoid physiology. *J. Evol. Biol.* **27**, 259–274.

633 **Pickering, A. D., Pottinger, T. G., Carragher, J. and Sumpter, J. P.** (1987). The effects  
634 of acute and chronic stress on the levels of reproductive hormones in the plasma of  
635 mature male brown trout, *Salmo trutta* L. *Gen. Comp. Endocrinol.* **68**, 249–259.

636 **Pottinger, T. G. and Carrick, T. R.** (1999). Modification of the plasma cortisol response  
637 to stress in rainbow trout by selective breeding. *Gen. Comp. Endocrinol.* **116**, 122–  
638 132.

639 **R Core Team** (2017). R: A language and environment for statistical computing.

640 **Reale, D., Dingemanse, N. J., Kazem, A. J. N. and Wright, J.** (2010). Evolutionary and  
641 ecological approaches to the study of personality. *Philos. Trans. R. Soc. B Biol. Sci.*  
642 **365**, 3937–3946.

643 **Ricklefs, R. E. and Wikelski, M.** (2002). The physiology/life-history nexus. *Trends Ecol.*  
644 *Evol.* **17**, 462–468.

645 **Roff, D. A. and Wilson, A. J.** (2014). Quantifying Genotype-by-Environment Interactions  
646 in Laboratory Systems. In *Genotype-by-Environment Interactions and Sexual*  
647 *Selection* (ed. Hunt, J.) and Hosken, D. J.), .

648 **Romero, L. M.** (2004). Physiological stress in ecology: Lessons from biomedical  
649 research. *Trends Ecol. Evol.* **19**, 249–255.

650 **Romero, L. M., Dickens, M. J. and Cyr, N. E.** (2009). The reactive scope model - A new  
651 model integrating homeostasis, allostasis, and stress. *Horm. Behav.* **55**, 375–389.

652 **Schielzeth, H.** (2010). Simple means to improve the interpretability of regression  
653 coefficients. *Methods Ecol. Evol.* **1**, 103–113.

654 **Schielzeth, H. and Forstmeier, W.** (2009). Conclusions beyond support: overconfident  
655 estimates in mixed models. *Behav. Ecol.* **20**, 416–420.

656 **Scott, A. P. and Canario, A. V. M.** (1992). 17 $\alpha$ , 20 $\beta$ -dihydroxy-4-pregnen-3-one 20-  
657 sulphate: a major new metabolite of the teleost oocyte maturation-inducing  
658 steroid. *Gen. Comp. Endocrinol.* **85**, 91–100.

659 **Scott, A. P. and Ellis, T.** (2007). Measurement of fish steroids in water-a review. *Gen.*  
660 *Comp. Endocrinol.* **153**, 392–400.

661 **Scott, A. P. and Vermeirssen, E. L. M.** (1994). Production of conjugated steroids by  
662 teleost gonads and their role as pheromones. *Perspect. Comp. Endocrinol.* 645–654.

- 663 **Scott, A. P., Hirschenhauser, K., Bender, N., Oliveira, R., Earley, R. L., Sebire, M.,**  
664 **Ellis, T., Pavlidis, M., Hubbard, P. C., Huertas, M., et al. (2008).** Non-invasive  
665 measurement of steroids in fish-holding water: important considerations when  
666 applying the procedure to behaviour studies. *Behaviour* **145**, 1307–1328.
- 667 **Segerstrom, S. C. and Miller, G. E. (2004).** Psychological stress and the human immune  
668 system: a meta-analytic study of 30 years of inquiry. *Psychol. Bull.* **130**, 601–30.
- 669 **Self, S. G. and Liang, K. (1987).** Asymptotic properties of maximum likelihood  
670 estimators and likelihood ratio tests under nonstandard conditions. *J. Am. Stat.*  
671 *Assoc.* **82**, 605–610.
- 672 **Selye, H. (1973).** The Evolution of the Stress Concept. *Am. Sci.* **61**, 692–699.
- 673 **Stedman, J. M., Hallinger, K. K., Winkler, D. W. and Vitousek, M. N. (2017).** Heritable  
674 variation in circulating glucocorticoids and endocrine flexibility in a free-living  
675 songbird. *J. Evol. Biol.* **30**, 1724–1735.
- 676 **Taff, C. C. and Vitousek, M. N. (2016).** Endocrine Flexibility: Optimizing Phenotypes in a  
677 Dynamic World? *Trends Ecol. Evol.* **31**, 476–488.
- 678 **Thompson, R. F. and Spencer, W. A. (1966).** Habituation: a model phenomenon for the  
679 study of neuronal substrates of behavior. *Psychol. Rev.* **73**, 16–43.
- 680 **Van Noordwijk, A. J. (1989).** Reaction Norms in Genetical Ecology. *Bioscience* **39**, 453–  
681 458.
- 682 **Via, S., Gomulkiewicz, R., De Jong, G., Scheiner, S. M., Schlichting, C. D. and Van**  
683 **Tienderen, P. H. (1995).** Adaptive phenotypic plasticity: consensus and  
684 controversy. *Trends Ecol. Evol.* **10**, 212–217.
- 685 **Visscher, P. M. (2006).** A Note on the Asymptotic Distribution of Likelihood Ratio Tests  
686 to Test Variance Components. *Twin Res. Hum. Genet.* **9**, 490–495.
- 687 **Vitousek, M. N., Jenkins, B. R. and Safran, R. J. (2014).** Stress and success: Individual  
688 differences in the glucocorticoid stress response predict behavior and reproductive  
689 success under high predation risk. *Horm. Behav.* **66**, 812–819.
- 690 **Vitousek, M. N., Taff, C. C., Hallinger, K. K., Zimmer, C. and Winkler, D. W. (2018).**  
691 Hormones and fitness: evidence for trade-offs in glucocorticoid regulation across  
692 contexts. *Front. Ecol. Evol.* **in press**, 1–14.
- 693 **White, S. J. and Wilson, A. J. (2018).** Evolutionary genetics of personality in the  
694 Trinidadian guppy I: maternal and additive genetic effects across ontogeny.  
695 *Heredity (Edinb).*
- 696 **White, S. J., Houslay, T. M. and Wilson, A. J. (2018).** Evolutionary genetics of  
697 personality in the Trinidadian guppy II: sexual dimorphism and genotype-by-sex  
698 interactions. *Heredity (Edinb).*

699 **Wickham, H.** (2017). tidyverse: Easily Install and Load “Tidyverse” Packages.  
700 **Williams, T. D.** (2008). Individual variation in endocrine systems: moving beyond the  
701 “tyranny of the Golden Mean”. *Philos. Trans. R. Soc. Lond. B. Biol. Sci.* **363**, 1687–  
702 1698.  
703 **Wilson, A. J.** (2018). How should we interpret estimates of individual repeatability?  
704 *Evol. Lett.* **2**, 4–8.  
705 **Wong, S. C., Dykstra, M., Campbell, J. M. and Earley, R. L.** (2008). Measuring water-  
706 borne cortisol in convict cichlids (*Amatitlania nigrofasciata*): is the procedure a  
707 stressor? *Behaviour* **145**, 1283–1305.  
708 **Young, A. J., Carlson, A. A., Monfort, S. L., Russell, A. F., Bennett, N. C. and Clutton-**  
709 **Brock, T.** (2006). Stress and the suppression of subordinate reproduction in  
710 cooperatively breeding meerkats. *Proc. Natl. Acad. Sci.* **103**, 12005–12010.  
711 **Zar, J. H.** (1996). *Biostatistical analysis*. London: Prentice-Hall International, Inc.  
712 **Zera, A. J., Harshman, L. G. and Williams, T. D.** (2007). Evolutionary Endocrinology:  
713 The Developing Synthesis between Endocrinology and Evolutionary Genetics.  
714 *Annu. Rev. Ecol. Evol. Syst.* **38**, 793–817.  
715

## 716 Tables

717

|     | Hormone                    | Effect        | Coefficient (SE) | DF      | F      | P      |
|-----|----------------------------|---------------|------------------|---------|--------|--------|
| (A) | Cortisol (free)            | (Intercept)   | 8.951 (0.116)    | 1,27.3  | 8845.0 | <0.001 |
|     |                            | Assay 1       | 0 (-)            | 3,64.7  | 14.2   | <0.001 |
|     |                            | Assay 2       | -0.617 (0.106)   |         |        |        |
|     |                            | Assay 3       | -0.578 (0.111)   |         |        |        |
|     |                            | Assay 4       | -0.318 (0.120)   |         |        |        |
|     |                            | Sex (Male)    | -0.799 (0.168)   | 1,27.5  | 37.8   | <0.001 |
|     |                            | Body mass     | -0.120 (0.084)   | 1,27.5  | 2.1    | 0.164  |
|     |                            | Order         | -0.014 (0.009)   | 1,100.0 | 2.6    | 0.115  |
|     |                            | Tank A        | 0 (-)            | 1,27.3  | 2.5    | 0.129  |
|     |                            | Tank B        | 0.153 (0.098)    |         |        |        |
| (B) | 11-ketotestosterone (free) | (Intercept)   | 1.308 (0.073)    | 1,65.9  | 1178.0 | <0.001 |
|     |                            | Assay 1       | 0 (-)            | 3,65.9  | 10.5   | <0.001 |
|     |                            | Assay 2       | 0.475 (0.088)    |         |        |        |
|     |                            | Assay 3       | 0.330 (0.089)    |         |        |        |
|     |                            | Assay 4       | 0.436 (0.090)    |         |        |        |
|     |                            | Sex (Male)    | 0.897 (0.115)    | 1,65.9  | 71.7   | <0.001 |
|     |                            | Assay 1 x Sex | 0 (-)            | 3,65.9  | 5.1    | 0.003  |
|     |                            | Assay 2 x Sex | -0.402 (0.128)   |         |        |        |
|     |                            | Assay 3 x Sex | -0.029 (0.130)   |         |        |        |
|     |                            | Assay 4 x Sex | -0.331 (0.131)   |         |        |        |
|     |                            | Body mass     | 0.062 (0.042)    | 1,65.9  | 2.2    | 0.155  |
|     |                            | Order         | -0.003 (0.005)   | 1,65.9  | 0.3    | 0.595  |
|     |                            |               |                  |         |        |        |

|        |                |        |     |       |
|--------|----------------|--------|-----|-------|
| Tank A | 0 (-)          | 1,65.9 | 3.1 | 0.078 |
| Tank B | -0.086 (0.049) |        |     |       |

718

719

720

721

Table 1: Fixed effect estimates from mixed-effects model analyses of free circulating (A) cortisol and (B) 11-ketotestosterone levels in individual guppies over four repeated measures.



| A) Free cortisol | Repeat 1             | Repeat 2             | Repeat 3             | Repeat 4              |
|------------------|----------------------|----------------------|----------------------|-----------------------|
| Repeat 1         | 0.127 (0.058,0.189)  | 0.121 (-0.505,0.327) | 0.345 (-0.074,0.486) | 0.141 (-0.45,0.352)   |
| Repeat 2         | 0.018 (-0.036,0.075) | 0.182 (0.087,0.28)   | 0.34 (-0.099,0.479)  | -0.239 (-1.262,0.077) |
| Repeat 3         | 0.06 (-0.006,0.126)  | 0.071 (-0.01,0.151)  | 0.237 (0.114,0.353)  | 0.265 (-0.217,0.429)  |
| Repeat 4         | 0.03 (-0.046,0.113)  | -0.062 (-0.159,0.03) | 0.078 (-0.031,0.189) | 0.364 (0.183,0.549)   |

  

| B) Free 11KT | Repeat 1              | Repeat 2              | Repeat 3             | Repeat 4              |
|--------------|-----------------------|-----------------------|----------------------|-----------------------|
| Repeat 1     | 0.076 (0.036,0.114)   | -0.184 (-1.214,0.113) | -0.017 (-0.79,0.251) | 0.197 (-0.382,0.367)  |
| Repeat 2     | -0.013 (-0.039,0.012) | 0.063 (0.03,0.096)    | 0.143 (-0.463,0.338) | -0.048 (-0.781,0.205) |
| Repeat 3     | -0.001 (-0.028,0.028) | 0.01 (-0.015,0.035)   | 0.076 (0.036,0.112)  | 0.103 (-0.551,0.313)  |
| Repeat 4     | 0.013 (-0.013,0.037)  | -0.003 (-0.023,0.019) | 0.007 (-0.018,0.031) | 0.059 (0.03,0.09)     |

Table 2: Covariance-correlation matrix (conditional on fixed effects) for free circulating (A) cortisol, (B) 11KT. Variances are on shaded diagonals, covariances below and correlations above. In parentheses are the 95% confidence intervals on calculated from 5000 bootstrapped replicates.

## Figures

### **Figure 1: Characterising individual variation in habituation.**

Main panel (A) shows how habituation across repeated stressor exposures is predicted to affect average levels of cortisol (adapted from Fig. 3 of Fischer et al., 2014). Inset panels show examples of three individuals sampled haphazardly from such a population, indicating (B) no consistent differences among individuals, (C) among-individual differences in intercept only (average cortisol levels differ but rate of habituation does not), (D) among-individual differences in both intercept and slope (variation in both average cortisol levels and the rate of habituation). Note that while absolute cortisol levels depicted here do not follow linear (i.e., straight line) reaction norms, this assumption is not made in our analysis. Rather we assume only that a straight line is adequate to describe each individual's deviation from the replicate-specific mean, as is the case in this depiction (E-G; dotted black line indicates zero deviation from the population mean).

### **Figure 2: Variation in free circulating cortisol (log-transformed nanograms) in guppies.**

Panel (A) shows changes in cortisol as a function of stressor exposure (here, sampling repeat) separately for each sex; points are predictions from a linear mixed effects model (with 95% confidence intervals), with raw individual-level data in faint lines. Panel (B) shows predictions for each individual from a random regression model (coloured by sex; shaded area gives 95% confidence interval around each prediction), and (C) shows individual deviations from the population mean after accounting for all fixed effects (including sex and repeat).

### **Figure 3: Variation in free circulating 11-ketotestosterone (log-transformed picograms) in guppies.**

Points show predictions from a linear mixed effects model (with 95% confidence intervals) as a function of stressor exposure (sampling repeat), plotted separately for each sex. Raw individual-level data is shown in faint lines.

**Figure 4: Change in individual variation in cortisol over increasing stressor exposures.**

Variance estimate and 95% confidence intervals (from 5000 bootstrapped replicates) for each sampling repeat, calculated from a multivariate mixed effects model fit with ASreml-R.

## Appendix A: Analysis of conjugated fractions of cortisol and 11-ketotestosterone

### *Mean effects*

We find significant effects of repeated stress exposure on conjugated hormone fractions. For the conjugated form of cortisol this appears to be due largely to increased concentrations at exposures 3 and 4 relative to earlier exposures (Table A1a). We find no sex differences in how these levels changed over the repeated measures (sex  $\times$  stressor number interaction:  $F_{3, 62.9} = 0.91$ ,  $P = 0.44$ ). We also find no clear sex differences in mean conjugated cortisol concentrations, although there is a positive effect of mass. Concentrations of the conjugated form of 11KT also change over repeats, rising to a peak at the third exposure before decreasing in the final exposure (Table A1b). Males exhibit consistently higher levels of conjugated 11KT, and there are no sex differences in the response to repeated assays ( $F_{3, 88.7} = 0.86$ ,  $P = 0.46$ ).

### *Among-individual variance: random regression*

Under the random regression approach, there is significant variance among individuals in the conjugated forms of both hormones. We find moderate adjusted repeatability for conjugated cortisol ( $R=0.26$  SE 0.10,  $\chi^2_{0.1} = 8.91$ ,  $P = 0.001$ ) and for 11KT ( $R=0.27$  (SE 0.10),  $\chi^2_{0.1} = 9.30$ ,  $P = 0.001$ ). For conjugated cortisol the comparison of random intercept and random slope models is non-significant ( $\chi^2_2 = 1.64$ ,  $P = 0.44$ ). For conjugated 11KT we do not detect any estimable variance in random slope ( $\chi^2_2 = 0$ ,  $P = 1$ ).

### *Among-individual variance: character state*

Using the character state approach, conjugated cortisol shows no significant change in variance over repeats, but there is significant within-individual covariance structure. The covariance-correlation matrix shows that correlations between pairs of assays are weakly positive (ranging from 0.131 to 0.411, Table A2a), and we also find a qualitative pattern of declining strength as the inter-observation time increases. Conjugated 11KT does show changes in variance across repeats ( $\chi^2_3 = 33.3$ ,  $P < 0.001$ ), as well as within-individual covariance structure ( $\chi^2_6 = 19.8$ ,  $P = 0.003$ ) and a pattern of positive correlations among repeats (ranging from 0.124 to 0.561, Table A2b), which tend to decline in strength with increasing inter-observation interval.

| <b>Hormone</b>                          | <b>Effect</b> | <b>Coefficient (SE)</b> | <b>DF</b> | <b>F</b> | <b>P</b> |
|-----------------------------------------|---------------|-------------------------|-----------|----------|----------|
| Cortisol<br>(conjugated)                | (Intercept)   | -1.125 (0.146)          | 1,26.9    | 94.7     | <0.001   |
|                                         | Assay 1       | 0 (-)                   | 3,64.3    | 3.3      | 0.026    |
|                                         | Assay 2       | -0.035 (0.105)          |           |          |          |
|                                         | Assay 3       | 0.277 (0.110)           |           |          |          |
|                                         | Assay 4       | 0.105 (0.117)           |           |          |          |
|                                         | Sex (Male)    | 0.207 (0.205)           | 1,27.1    | 1.0      | 0.322    |
|                                         | Body mass     | 0.557 (0.103)           | 1,27.2    | 29.3     | <0.001   |
|                                         | Order         | 0.010 (0.010)           | 1,115.6   | 1.1      | 0.295    |
|                                         | Tank A        | 0 (-)                   | 1,26.9    | 2.4      | 0.132    |
|                                         | Tank B        | -0.186 (0.119)          |           |          |          |
| 11-<br>ketotestosterone<br>(conjugated) | (Intercept)   | 1.764 (0.163)           | 1,27.3    | 217.1    | <0.001   |
|                                         | Assay 1       | 0 (-)                   | 3,91.1    | 9.8      | <0.001   |
|                                         | Assay 2       | 0.132 (0.126)           |           |          |          |
|                                         | Assay 3       | 0.646 (0.126)           |           |          |          |
|                                         | Assay 4       | 0.176 (0.126)           |           |          |          |
|                                         | Sex (Male)    | 1.381 (0.241)           | 1,27.4    | 32.9     | <0.001   |
|                                         | Body mass     | 0.165 (0.120)           | 1,27.4    | 1.9      | 0.182    |
|                                         | Order         | 0.037 (0.012)           | 1,118.0   | 10.2     | 0.002    |
|                                         | Tank A        | 0 (-)                   | 1,27.4    | 1.3      | 0.269    |
|                                         | Tank B        | -0.158 (0.140)          |           |          |          |

Table A2: Fixed effect estimates from mixed-effects model analyses of conjugated  
(a) cortisol and (b) 11-ketotestosterone levels in individual guppies over four  
repeated measures.

| c) Conjugated cortisol | Repeat 1             | Repeat 2             | Repeat 3             | Repeat 4             |
|------------------------|----------------------|----------------------|----------------------|----------------------|
| Repeat 1               | 0.238 (0.116,0.367)  | 0.411 (-0.008,0.519) | 0.202 (-0.394,0.356) | 0.131 (-0.499,0.327) |
| Repeat 2               | 0.126 (-0.001,0.245) | 0.396 (0.198,0.609)  | 0.379 (-0.04,0.492)  | 0.162 (-0.376,0.368) |
| Repeat 3               | 0.045 (-0.042,0.122) | 0.109 (-0.005,0.217) | 0.208 (0.097,0.321)  | 0.367 (-0.052,0.508) |
| Repeat 4               | 0.029 (-0.053,0.11)  | 0.046 (-0.052,0.16)  | 0.075 (-0.005,0.16)  | 0.201 (0.098,0.309)  |

  

| d) Conjugated 11KT | Repeat 1             | Repeat 2             | Repeat 3             | Repeat 4             |
|--------------------|----------------------|----------------------|----------------------|----------------------|
| Repeat 1           | 0.231 (0.105,0.346)  | 0.477 (0.113,0.582)  | 0.176 (-0.404,0.371) | 0.124 (-0.6,0.31)    |
| Repeat 2           | 0.157 (0.018,0.292)  | 0.471 (0.246,0.729)  | 0.267 (-0.184,0.439) | 0.372 (-0.034,0.517) |
| Repeat 3           | 0.1 (-0.105,0.313)   | 0.215 (-0.074,0.537) | 1.381 (0.646,2.053)  | 0.561 (0.273,0.645)  |
| Repeat 4           | 0.029 (-0.062,0.109) | 0.123 (-0.005,0.264) | 0.319 (0.07,0.553)   | 0.233 (0.102,0.357)  |

Table A2: Covariance-correlation matrix (conditional on fixed effects) for conjugated circulating (a) cortisol, (b) 11KT. Variances are on shaded diagonals, covariances below and correlations above. In parentheses are the 95% confidence intervals on calculated from 5000 bootstrapped replicates.

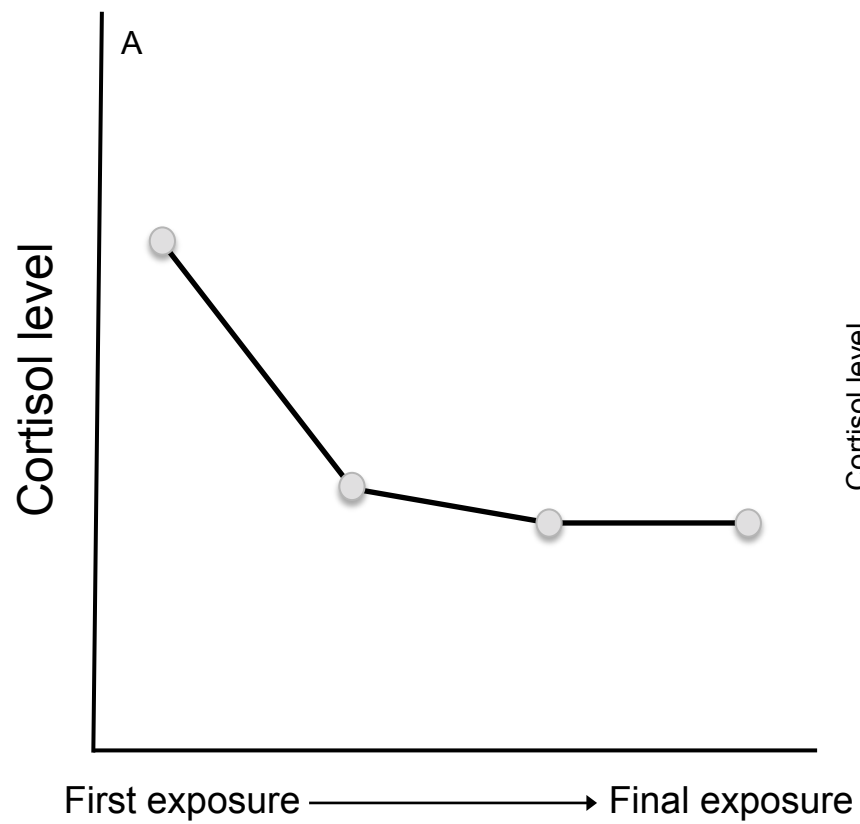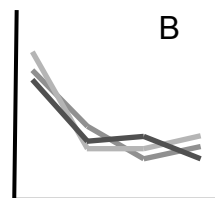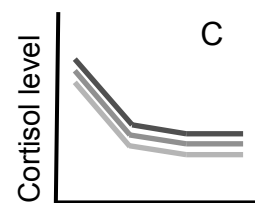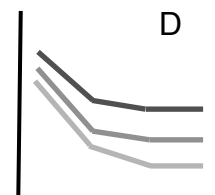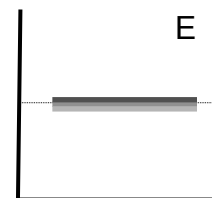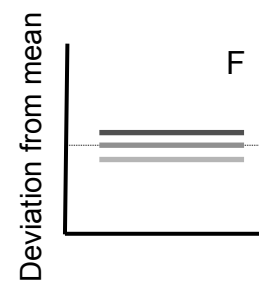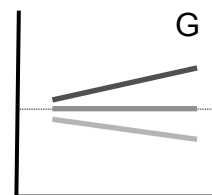



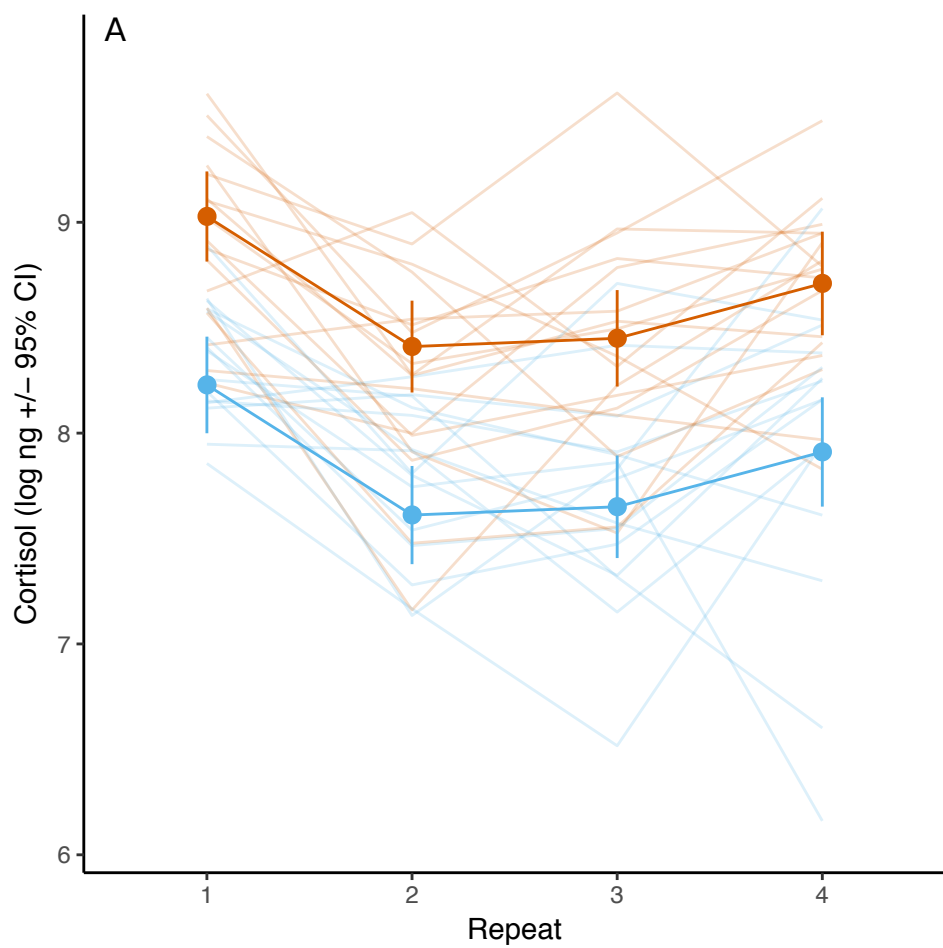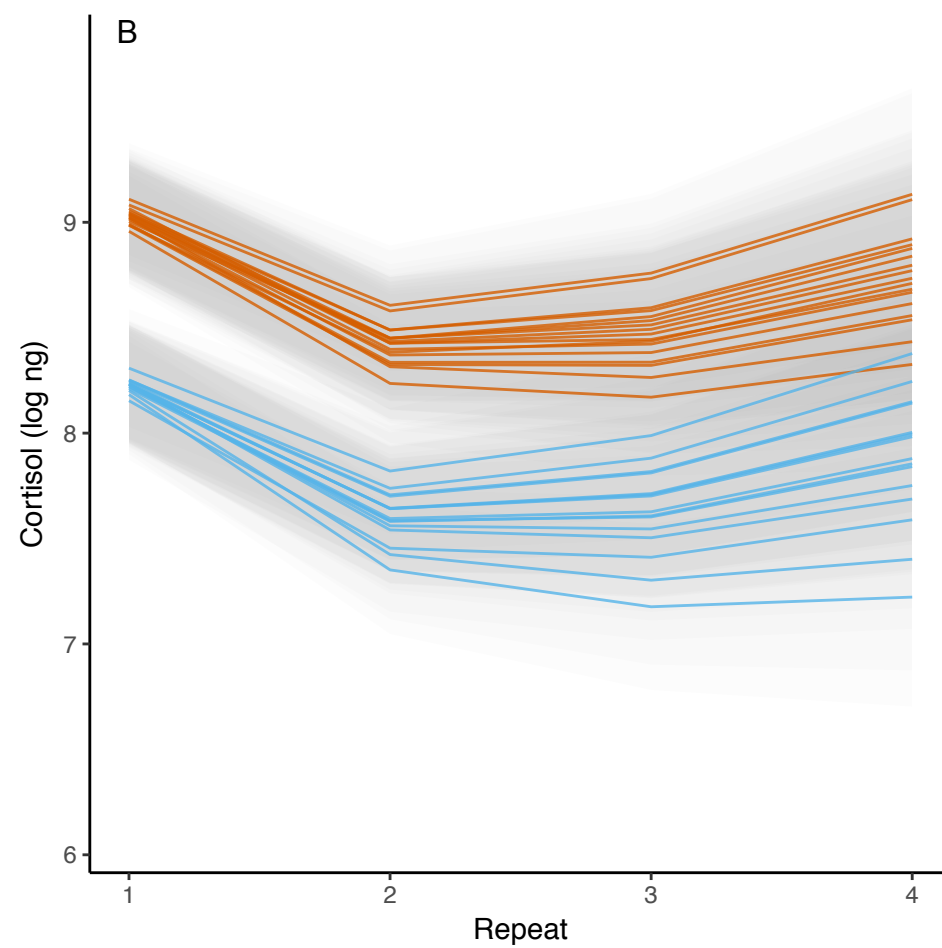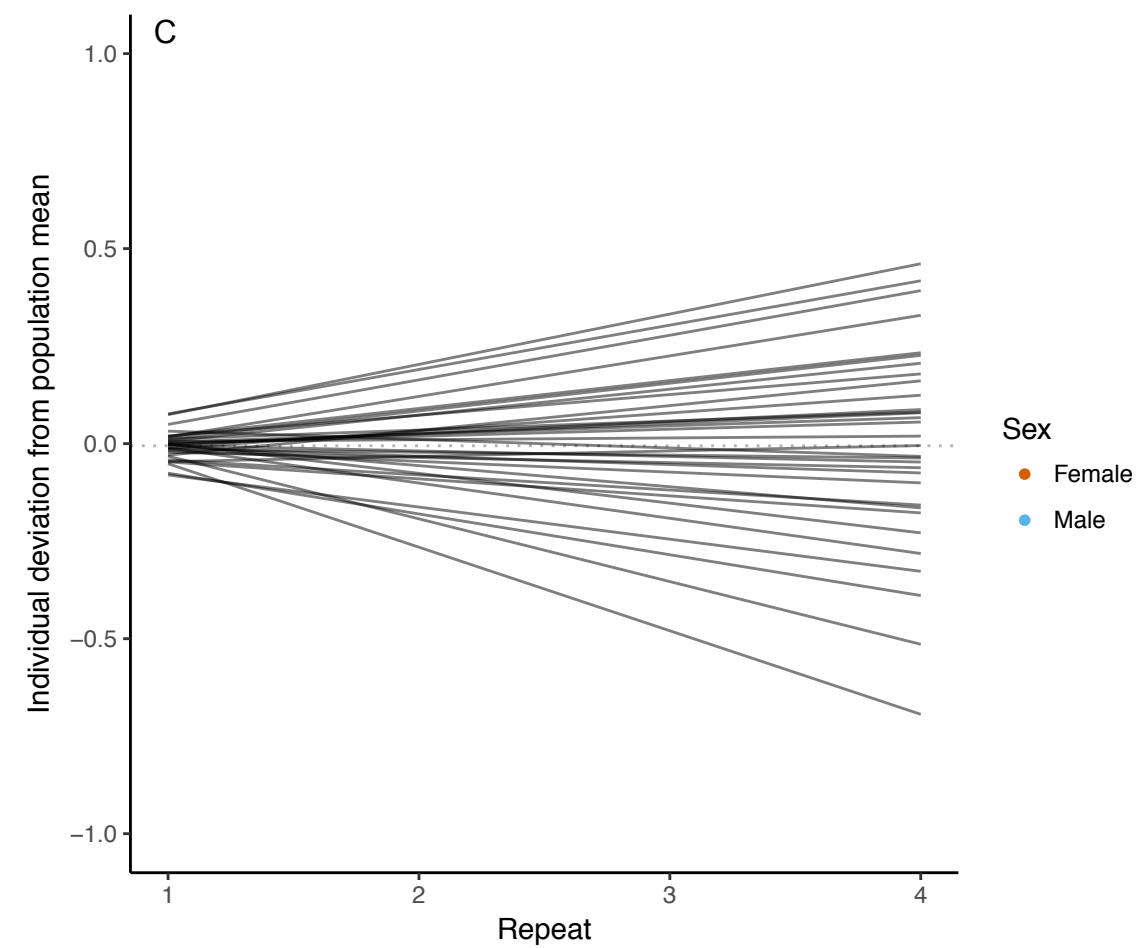

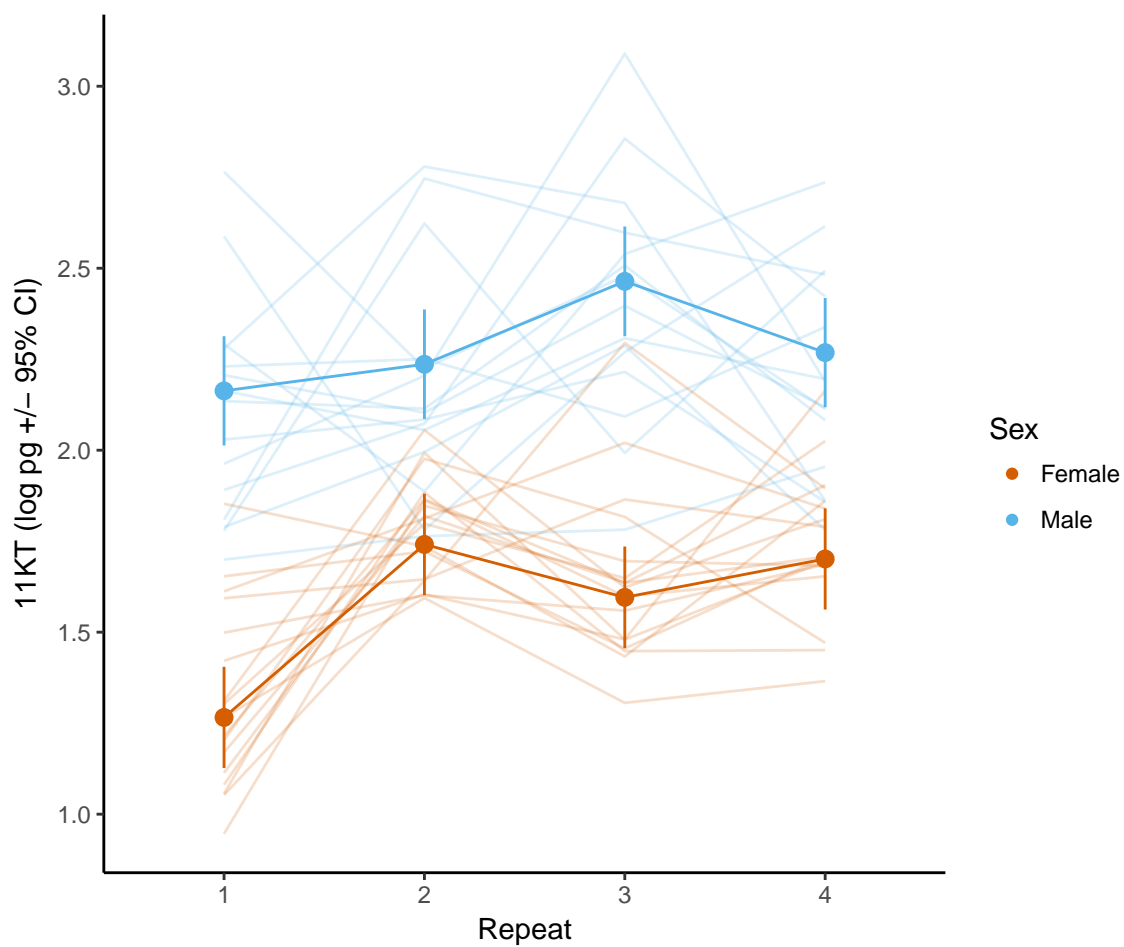

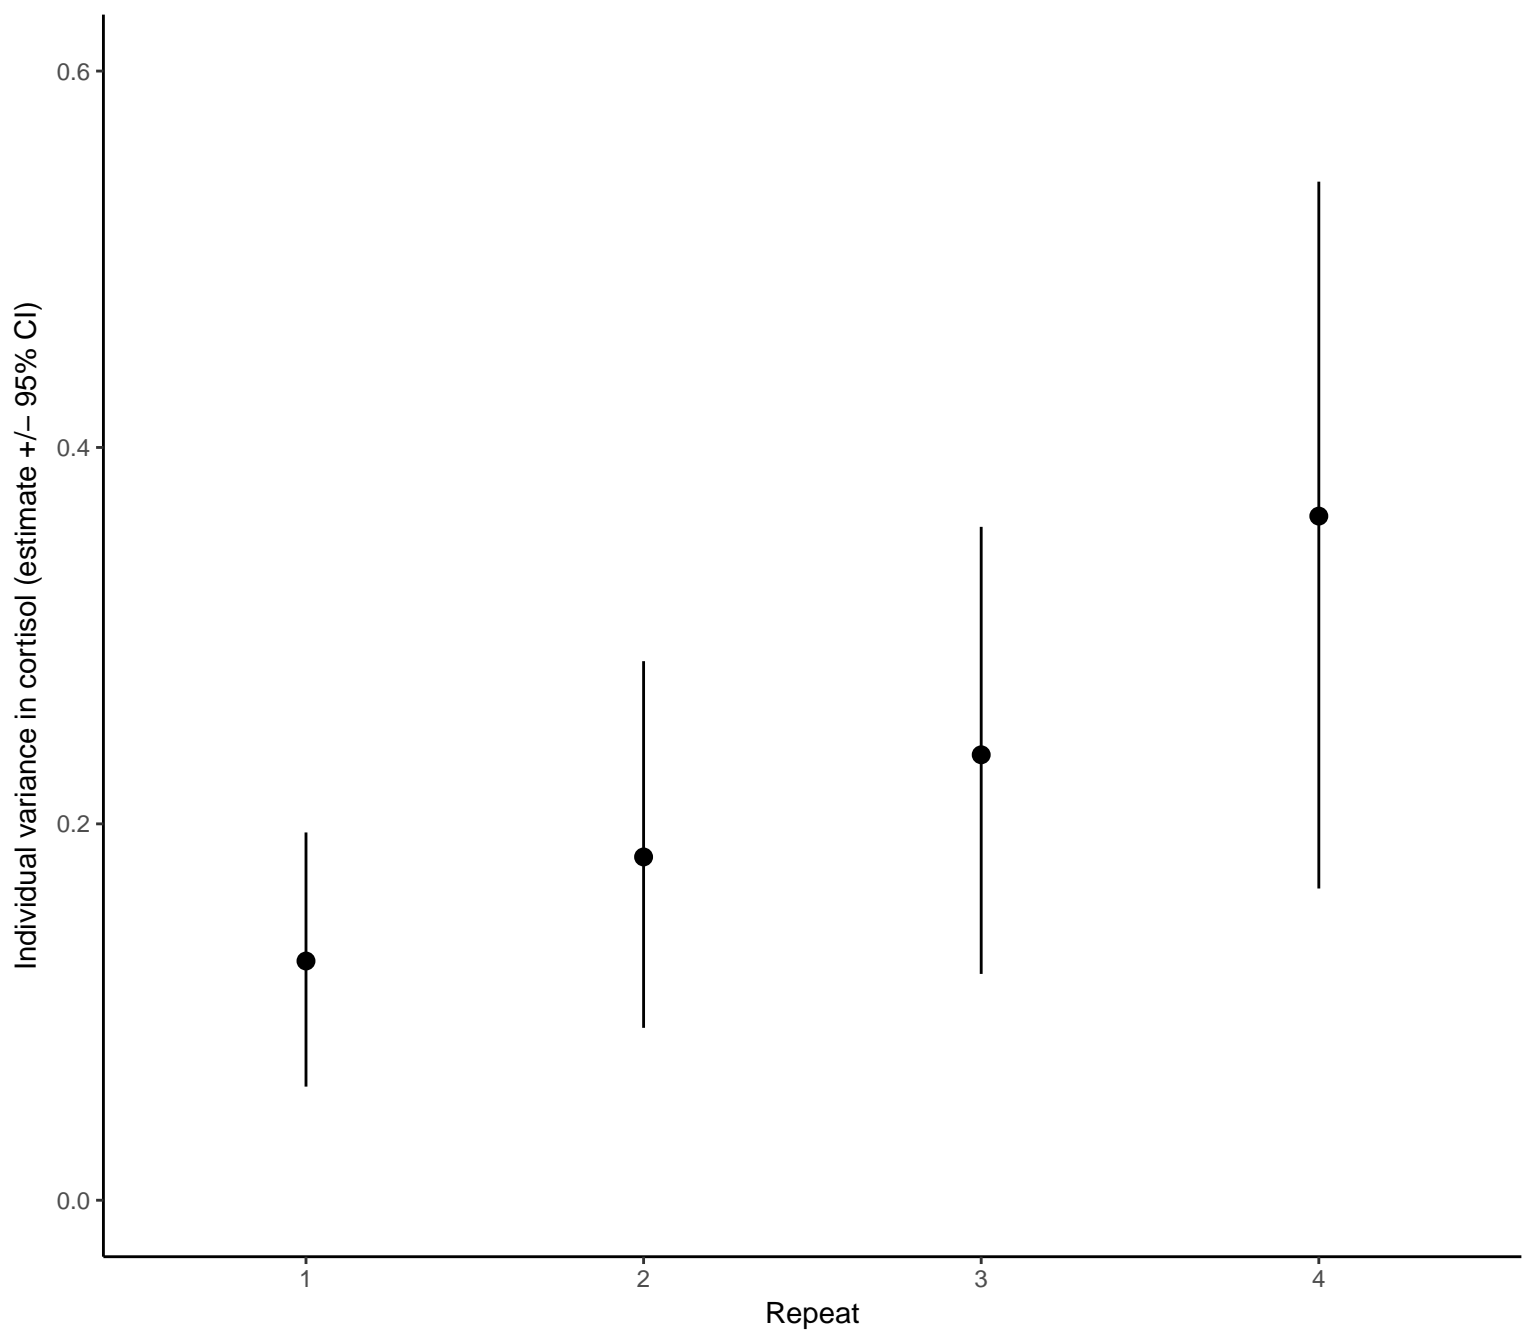

Source: https://www.biorxiv.org/content/10.1101/337006v1.full.pdf
